# Supplementary material for: Oleate Abrogates Palmitate-Induced Lipotoxicity and Proinflammatory Response in Human Bone Marrow-Derived Mesenchymal Stem Cells and Osteoblastic Cells
Source: Oxford University Press journal article supplement (doi:10.1210/en.2015-1303), 2015-09-01
Supplement: en-15-1303.pdf [file en-15-1303.pdf]

**Supplemental Figure 1. Phenotypic characterization of mesenchymal stem cells isolated from bone marrow.** (A) Cell surface markers were characterized by FACS flow cytometer. Values are mean  $\pm$  SEM of 15 individual experiments. (B) Representative FACS results of 1 out of 15 individual experiments. (C) Representative staining results of osteogenic (ARS and ALP staining) and adipogenic differentiation (Oil Red staining) of 1 out of 15 individual experiments. MSC were cultured for 14 days in the specific differentiation media. (D) Expression of 2 specific bone markers after 14 days in osteogenic medium. Runx2 and OCN expression were quantified by qPCR using the  $\Delta\Delta$ CT method. Values were normalized for HPRT1 expression and are expressed as the  $\Delta\Delta$ CT compared to D0. Results are means  $\pm$  SEM of 5 individual experiments. \*\*  $p < 0.01$  vs D0.

**Supplemental Figure 2. Oleate suppressed palmitate-induced cytotoxicity in SaOS-2 and Ob.** SaOS-2 (A,B) and Ob (C) were treated with increasing concentrations of Palm (0.125 mM to 0.50 mM)  $\pm$  Ole (0.05 mM or 0.25 mM) for the indicated times. (A) Cell viability was quantified by nuclear staining with Hoechst and propidium iodide. Values are mean  $\pm$  SEM of 5 individual experiments. (B,C) Caspases-3/7 activity was measured using the Caspases-3/7 Glo assay. Values are expressed relative to Ctrl and are mean  $\pm$  SEM of 5 individual experiments for SaOS-2 (B) and 4 individual experiments for Ob (C). \* $p < 0.05$ , \*\* $p < 0.01$ , \*\*\* $p < 0.001$  vs appropriate control (Ctrl, 24, 48 or 72 h); # $p < 0.05$  vs 0.25 mM Palm.

**Supplemental Figure 3. Oleate blocked palmitate-induced activation of ERK.** SaOS-2 were treated for 16 h with 0.25 mM Palm  $\pm$  0.25 mM Ole. ERK phosphorylation was evaluated by western blotting and normalized for total ERK. The figure is representative of 1 out of 3 individual experiments. Values are mean  $\pm$  SEM. \* $p < 0.05$  vs Ctrl, # $p < 0.05$  vs 0.25 mM Palm.

**Supplemental Figure 4. Oleate prevented palmitate activation of NF- $\kappa$ B.** MSC were treated for 48 h with 0.50 mM Palm or 0.25 mM Palm plus 0.25 mM Ole. NF- $\kappa$ B activity was regularly evaluated by ELISA. Values are expressed relative to Ctrl and are means  $\pm$  SEM of 6 individual experiments.

**Supplemental Figure 5. Oleate suppressed palmitate-induced cytotoxicity in WJ-MSC.** Cells were treated with increasing concentrations of Palm (0.125 mM to 0.50 mM)  $\pm$  0.25 mM Ole for the indicated times. Cell viability was quantified by nuclear staining with Hoechst and propidium iodide.



### Céline Gillet Supplemental Figure 2 Top

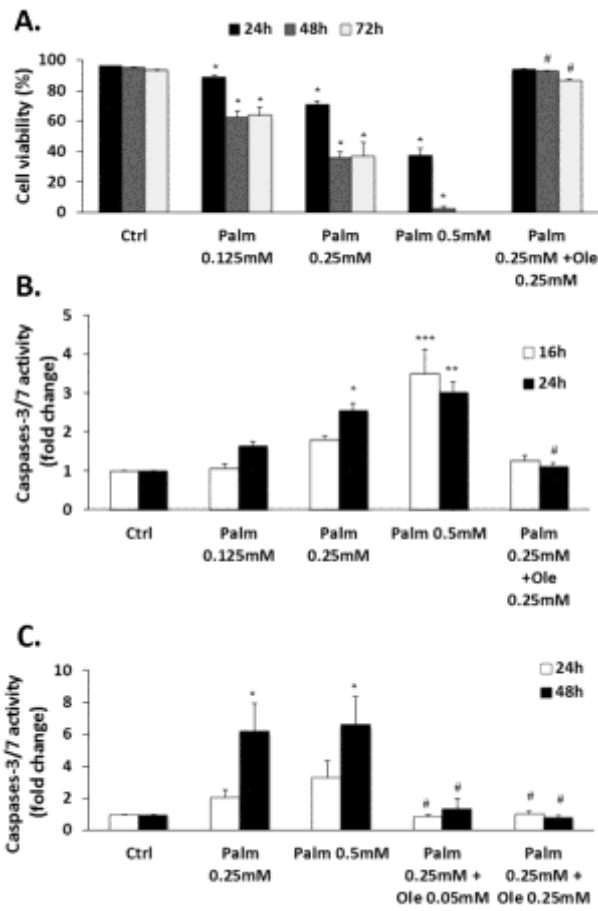

### Celine Gillet Supplemental Figure 3 Top

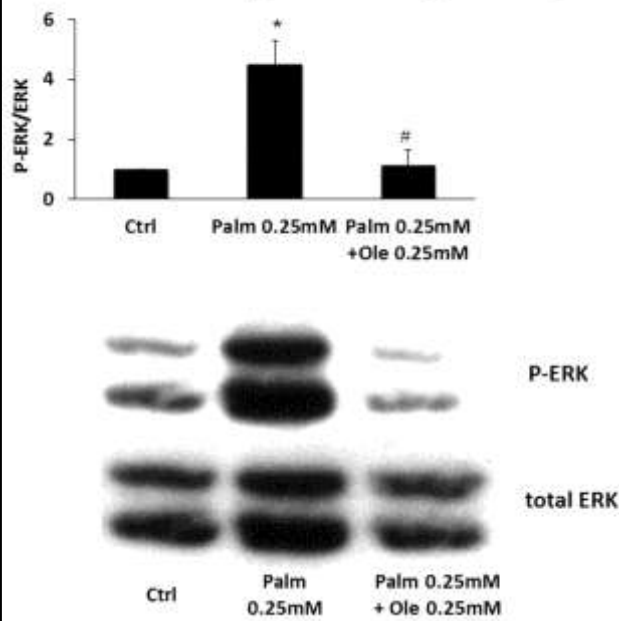

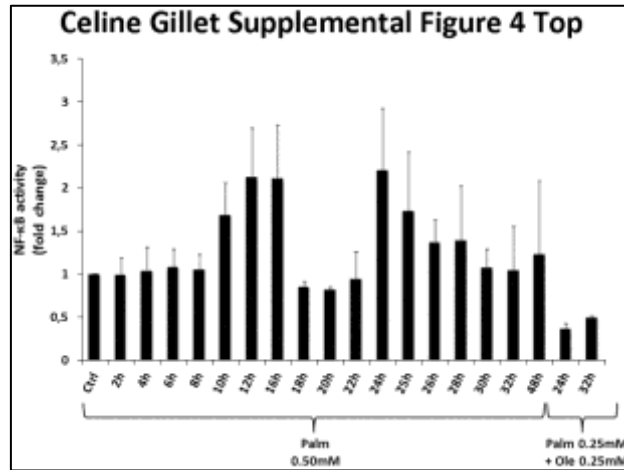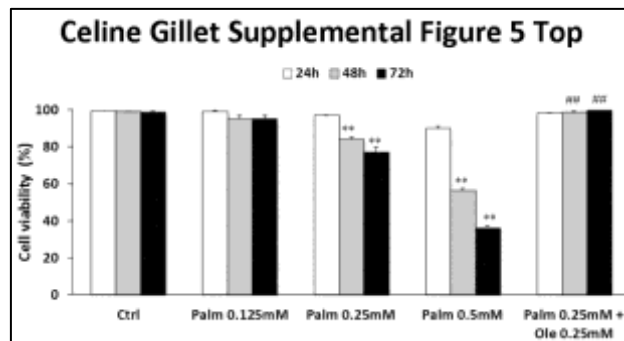

## Supplemental material

### Supplemental Table 1 Primer sequences for standard PCR

| Name      | Sequence                     | Product size (bp) |
|-----------|------------------------------|-------------------|
| HPRT1-For | 5'-TTCCTCCTCCTGAGCAGTCA-3'   | 564               |
| HPRT1-Rev | 5'-ATCCAACACTTCGTGGGGTC-3'   |                   |
| TLR4-For  | 5'-ACAGAAGCTGGTGGCTGTG-3'    | 291               |
| TLR4-Rev  | 5'-TCTTTAAATGCACCTGGTTGG-3'  |                   |
| XBP1-For  | 5'-TCATGGCCTTGTAGTTGAGAAC-3' | 289 or 263        |
| XBP1-Rev  | 5'-GGCATTGAAGAACATGACTGG-3'  |                   |

**Supplemental Table 2 Primer sequences for real-time PCR**

| Name      | Sequence                          | Product size (bp) |
|-----------|-----------------------------------|-------------------|
| ATF4-For  | 5'-CTCCAGCGACAAGGCTAAGG-3'        | 180               |
| ATF4-Rev  | 5'-GGCATGGTTTCCAGGTCATC-3'        |                   |
| BiP-For   | 5'-ACCAATTATCAGCAAACCTCTATGGAA-3' | 74                |
| BiP-Rev   | 5'-CATCTTTTTTCTGCTGTATCCTCTTCA-3' |                   |
| CHOP-For  | 5'-TGGAAGCCTGGTATGAGGAC-3'        | 123               |
| CHOP-Rev  | 5'-AAGCAGGGTCAAGAGTGGTG-3'        |                   |
| CCL2-For  | 5'-AGCAAGTGTCCCAAAGAAGC-3'        | 93                |
| CCL2-Rev  | 5'-CATGGAATCCTGAACCCACT-3'        |                   |
| HPRT1-For | 5'-GGCGTCGTGATTAGTGATGAT-3'       | 189               |
| HPRT1-Rev | 5'-CTTGAGCACACAGAGGGCTAC-3'       |                   |
| IL6-For   | 5'-AGCCACTCACCTCTTCAGAACGAA-3'    | 122               |
| IL6-Rev   | 5'-CAGTGCCTCTTTGCTGCTTTCACA-3'    |                   |
| IL8-For   | 5'-GGACCACACTGCGCCAACACAG-3'      | 98                |
| IL8-Rev   | 5'-TCCACAACCCTCTGCACCCAGTT-3'     |                   |
| OCN-For   | 5'-GTGCAGCCTTTGTGTCCAAG-3'        | 157               |
| OCN-Rev   | 5'-TCAGCCAACTCGTCACAGTC-3'        |                   |
| Runx2-For | 5'-GATGACACTGCCACCTCTGA-3'        | 118               |
| Runx2-Rev | 5'-ATGAAATGCTTGGGAACTGC-3'        |                   |
| TLR4-For  | 5'-GAGAACTTCCCCATTGGACA-3'        | 165               |
| TLR4-Rev  | 5'-CCGCAAGTCTGTGCAATAAA-3'        |                   |
| XBP1-For  | 5'-TTGTCACCCCTCCAGAACATC-3'       | 74                |
| XBP1-Rev  | 5'-CAGGATATCAGACTCTGAATCTGAAGA-3' |                   |
